# Supplementary material for: Identification and characterization of the cytosine-5 DNA methyltransferase gene family in Salvia miltiorrhiza
Source: PeerJ. 2018 Mar 5;6:e4461. doi: 10.7717/peerj.4461 (PMC5842782; doi:10.7717/peerj.4461)
Supplement: Table S1 [file peerj-06-4461-s001.xlsx]

## Sheet: Sheet1
Gene ID	Forward primer	Reverse primer
SmMET1	ACGAACGGATATGGCCTGGTAC	GGCAAGCCTCGCAGTTTTCAA
SmCMT1	CAGAAGTTGCTCGCCATTTGC	AGCACGGCCATAACCTTTCCA
SmCMT2a	TGCCTGGTTACGATTCTCCCA	ACACTCGACAGTTTGGCACCA
SmCMT2b	CCAATGGCGTCGCGATGAAAA	AGCGCTCACCTGCAACATTTC
SmCMT3	GGGATCCTGATGTGCCAAGACA	TCATCCCACCACAAACGTCCA
SmDRM1	AGAGGGTTGAGAGTGAGGCTGA	TTTCGTCCCACCCACACCAAA
SmDRM2	TCCGCAGCATCACAGTCGAAT	CCAACGTGTCTGTCTGGAACGA
SmDNMT2	TTTTGGCTACCTGTCCCGCAA	AGAGTGGAAATTGGCGACCTCC
SmUBQ10	AGATGGGCGGACACTTGCTGATTA	ACTCTCCACCTCCAAAGTGATGGT
