# Supplementary material for: Identification and characterization of the cytosine-5 DNA methyltransferase gene family in Salvia miltiorrhiza
Source: PeerJ. 2018 Mar 5;6:e4461. doi: 10.7717/peerj.4461 (PMC5842782; doi:10.7717/peerj.4461)
Supplement: Table S3 [file peerj-06-4461-s003.xlsx]

## Sheet: Sheet1
GeneID	periderm	phloem	xylem	YE-12h	YE-1h	Control	MeJA-1h	MeJA-6h	SA-0 h	SA-2 h	SA-8 h
SmMET1	2.41686	3.20381	2.15026	3.61196	5.00246	5.22911	3.80912	2.73311	3.96852	2.56827	2.32727
SmCMT1	0.204399	0.610564	0.205596	5.1464	9.90532	9.67982	9.27588	5.10836	10.8145	10.785	6.60092
SmCMT2a	3.14137	1.88496	1.5989	5.7386	10.5017	9.00744	7.89513	6.49498	12.6006	13.8129	5.81899
SmCMT2b	2.12941	3.22229	2.88773	5.68668	7.0826	7.30324	6.99185	5.42245	7.9056	8.60652	4.82405
SmCMT3	0.342065	0.59466	0.197377	6.45762	9.81762	10.0409	9.6443	4.79843	17.099	9.40611	5.83756
SmDRM1	14.3079	7.32307	7.04506	14.1524	9.78127	11.0609	10.6437	15.1296	21.3298	23.8054	11.3225
SmDRM2	6.5028	7.28269	7.22044	5.2232	4.55001	5.83394	5.47268	7.15232	5.58411	7.23835	4.53246
SmDNMT2	26.3411	22.4502	24.8589	15.2414	15.2443	14.6631	16.5561	14.2105	10.776	12.3569	12.609
